# Supplementary material for: The Role of Social Network Technologies in Online Health Promotion: A Narrative Review of Theoretical and Empirical Factors Influencing Intervention Effectiveness
Source: PubMed Central journal article supplement (PMC4526933; doi:10.2196/jmir.3662), 2015-06-11
Supplement: jmir_v17i6e141_app1.pdf [file jmir_v17i6e141_app1.pdf]

# 1. Multimedia Appendix 1. List of extracted items.

## *Effectiveness Studies*

To identify the limits of current effectiveness evaluations of social networking in a health promotion intervention, we define the following sub-categories:

1. What is being evaluated?
  1. Whole intervention: HP + SNS together.
  2. HP component only (e.g. effect of moderator/educator in a forum).
  3. SNS component only (e.g. effect of online community within an HP intervention).
2. What kind of effectiveness?
  1. Usability and User Satisfaction .
  2. Adherence/Engagement and technology acceptance .
  3. Self-reported behaviour change.
  4. Objectively measured behaviour change (e.g. step counts).
3. Long-term or short-term?
  1. Short-term: during or shortly after an intervention (e.g. within 6 months).
  2. Long-term: sustained adherence or behaviour change (e.g. more than 6 months after start of an intervention).

In particular, in Table 1, we use the following notation in the column for effectiveness evaluation (if included in the study):

<1: component being evaluated>; <2: effect on what?>; <3: approximate level of evidence>

Field 1 can take one of three values: social networking component only (SNS), health promotion component only (HP), or whole intervention (SNS+HP). Field 2 is labelled according to the behaviour change required (e.g. smoking abstinence or treatment adherence), level of engagement, technology acceptance, user satisfaction and usability. Field 3 indicates the approximate level of evidence using the categories below:

|                                                 |       |
|-------------------------------------------------|-------|
| RCT: objectively measured effect, long-term:    | +++++ |
| RCT: objectively measured effect, short-term:   | ++++  |
| RCT: self-reported effect, long-term:           | +++   |
| RCT: self-reported effect, short-term:          | ++    |
| Observational study: strong association:        | ++    |
| Observational study: weak association:          | +     |
| Qualitative or pilot study: positive:           | +     |
| Qualitative or pilot study: mixed result:       | +/-   |
| RCT with no significant result:                 | 0     |
| Observational study with no clear associations: | 0     |

## *Theoretical Grounding*

In the case of theoretical grounding (Table 2) the following type of information was extracted after full-text review of the selected papers:

- Type of theory or model used (if any);

- Relationship between top-down and bottom-up approaches to intervention design. Theories, if any, that drive the top-down process were recorded, as well as any participatory process where citizens knowingly contributed bottom-up knowledge using social networking or other form of input;
- Relationship between health promotion and social network. In this case the following notation was used:
  - HP → SNS: Emphasis on top-down design
  - HP ← SNS: Emphasis on bottom-up flow of knowledge through observation and/or participation
  - HP ↔ SNS: Both aspects included in study.
